# Supplementary material for: Risk Factors and Outcomes of Recurrent Candidemia in Children: Relapse or Re-Infection?
Source: MDPI journal article supplement (doi:10.3390/jcm8010099), 2019-01-16
Supplement: s1 [file s1]

Supplementary Table 1. Comparisons of early recurrent episodes and late recurrent episodes of candidemia in children.

|                                                    | Early recurrent episodes of<br>candidemia (total n=29) | Late recurrent episodes of<br>candidemia (total n=28) | P-value |
|----------------------------------------------------|--------------------------------------------------------|-------------------------------------------------------|---------|
| Age                                                |                                                        |                                                       |         |
| Non-neonatal patients (years), median (IQR)        | 2.4 (0.9-7.2)                                          | 1.8 (0.8-7.1)                                         | 0.112   |
| Neonatal patients (days), median (IQR)             | 53.5 (36.5-71.5)                                       | 66.5 (52.5-76.3)                                      | 0.223   |
| Sex (male gender)                                  | 14 (48.3)                                              | 13 (46.4)                                             | 1.000   |
| Hospital days until diagnosis, median (IQR)        | 41.0 (22.0-72.5)                                       | 44.0 (19.5-84.5)                                      | 0.451   |
| Ward                                               |                                                        |                                                       | 0.062   |
| Neonatal intensive care unit                       | 7 (24.1)                                               | 5 (17.9)                                              |         |
| Pediatric intensive care unit                      | 17 (58.6)                                              | 12 (42.9)                                             |         |
| Burn or surgical intensive care unit               | 2 (6.9)                                                | 3 (10.7)                                              |         |
| General wards                                      | 3 (10.3)                                               | 8 (28.6)                                              |         |
| Underlying chronic comorbidities <sup>#</sup>      |                                                        |                                                       |         |
| Congenital or genetic anomalies                    | 6 (20.7)                                               | 5 (17.9)                                              | 0.786   |
| Neurological sequelae                              | 12 (41.4)                                              | 17 (60.7)                                             | 0.189   |
| Cardiovascular disease                             | 6 (20.7)                                               | 3 (10.7)                                              | 0.302   |
| Chronic lung disease and/or pulmonary hypertension | 13 (44.8)                                              | 6 (21.4)                                              | 0.092   |
| Gastrointestinal sequelae                          | 12 (41.4)                                              | 17 (60.7)                                             | 0.189   |
| Renal insufficiency with/without dialysis          | 4 (13.8)                                               | 4 (14.3)                                              | 0.957   |
| Hematological/Oncology cancer                      | 4 (13.8)                                               | 0 (0)                                                 | 0.060   |

|                                                  |           |           |       |
|--------------------------------------------------|-----------|-----------|-------|
| Immunodeficiency                                 | 1 (3.4)   | 0 (0)     | 0.322 |
| Autoimmune disease                               | 1 (3.4)   | 0 (0)     | 0.322 |
| Hepatic failure or cholestasis                   | 0 (0)     | 1 (3.6)   | 0.305 |
| Pathogens                                        |           |           | 0.679 |
| <i>Candida albicans</i>                          | 7 (24.1)  | 10 (35.7) |       |
| <i>Candida parapsilosis</i>                      | 13 (44.8) | 10 (35.7) |       |
| <i>Candida tropicalis</i>                        | 1 (3.4)   | 2 (7.1)   |       |
| <i>Candida glabrata</i>                          | 4 (13.8)  | 3 (10.7)  |       |
| <i>Candida guilliermondii</i>                    | 0 (0)     | 1 (3.6)   |       |
| Other <i>Candida</i> spp.                        | 4 (13.8)  | 2 (7.1)   |       |
| Clinical presentation                            |           |           |       |
| Severe sepsis                                    | 15 (51.7) | 10 (35.7) | 0.289 |
| Septic shock                                     | 12 (41.4) | 8 (28.6)  | 0.408 |
| Progressive and deteriorated <sup>¶</sup>        | 10 (34.5) | 4 (14.3)  | 0.077 |
| Disseminated candidiasis <sup>\$</sup>           | 1 (3.4)   | 1 (3.6)   | 0.980 |
| Predisposing risk factors <sup>#</sup>           |           |           |       |
| Receipt of systemic antibiotics <sup>&amp;</sup> | 29 (100)  | 27 (96.4) | 0.491 |
| Previous azole exposure <sup>&amp;</sup>         | 15 (51.7) | 9 (32.1)  | 0.182 |
| Prior bacteremia <sup>&amp;</sup>                | 25 (86.2) | 21 (75.0) | 0.331 |
| Presence of CVC                                  | 29 (100)  | 28 (100)  | 1.000 |
| Stay in an intensive care unit                   | 14 (48.2) | 16 (57.1) | 0.526 |
| Receipt of parenteral nutrition                  | 21 (72.4) | 21 (75.0) | 0.981 |

|                                                |           |           |       |
|------------------------------------------------|-----------|-----------|-------|
| Receipt of immunosuppressants                  | 8 (27.6)  | 2 (7.1)   | 0.045 |
| Artificial device other than CVC               | 20 (70.0) | 21 (75.0) | 0.770 |
| Prior surgery <sup>&amp;</sup>                 | 12 (41.4) | 7 (25.0)  | 0.263 |
| Neutropenia (ANC < 0.5 × 10 <sup>3</sup> / μL) | 11 (37.9) | 6 (21.4)  | 0.248 |

<sup>#</sup>Indicated the presence of underlying condition or risk factor at onset of candidemia, and most patients with candidemia had >1 underlying condition and/or risk factor.

<sup>&</sup>Within one month prior to onset of candidemia, prior azoles exposure indicated patients received an azoles drug in addition to the antifungal agents at the time of candidemia.

<sup>¶</sup>Defined as candidemia episodes with more disseminated candidiasis and/or progressive multi-organ failure even after effective antifungal agents.

<sup>\$</sup>Indicated positive *Candida* isolates recovered from more than two sterile sites, in addition to primary bloodstream infection.

IQR: interquartile range; CVC: central venous catheter; ANC: absolute neutrophil count.
